# Supplementary material
Source: PubMed Central journal article supplement (PMC2519744)
Supplement: supp_28_17_5184__1.pdf [file supp_28_17_5184__1.pdf]

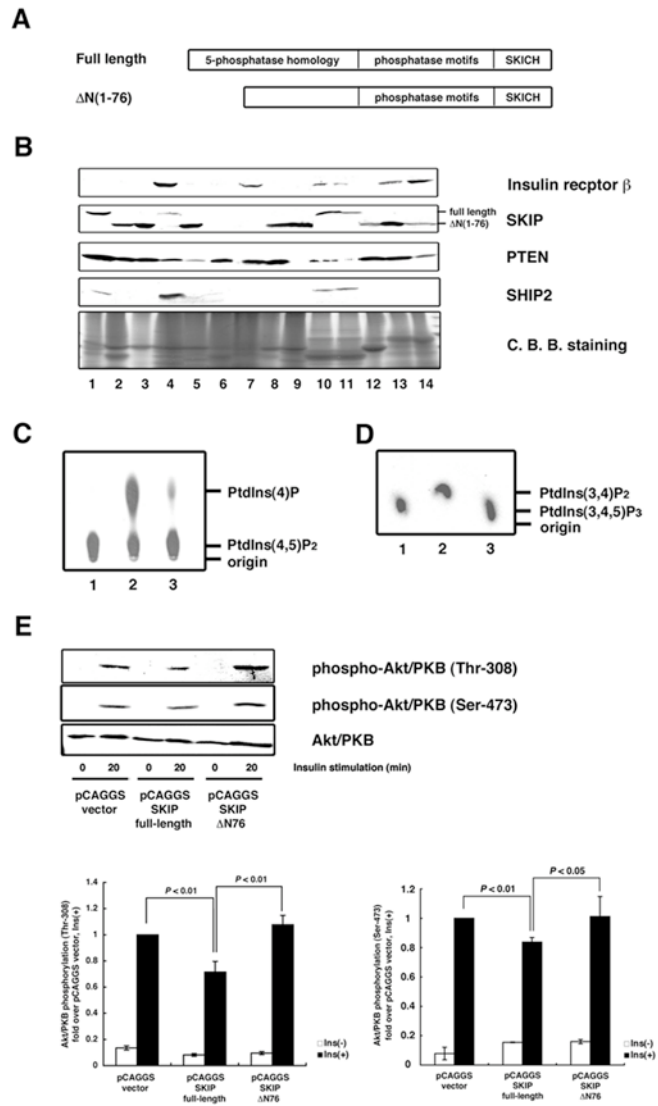

Supplementary Fig. 1 Ijuin et al.

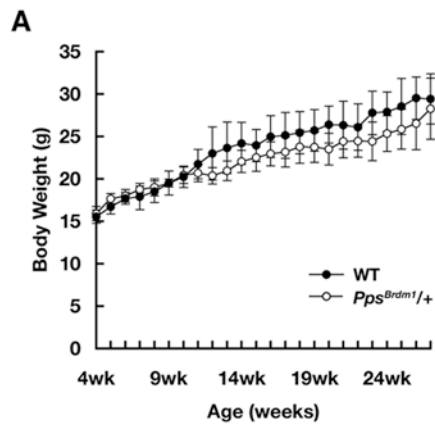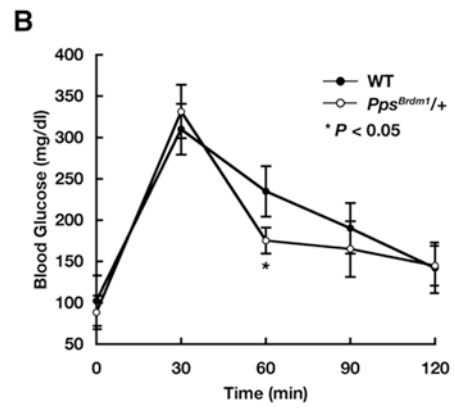

Supplementary Fig. 2 Ijuin et al.

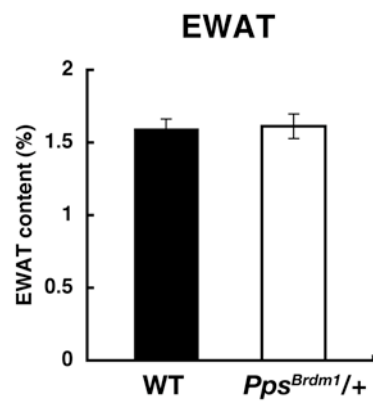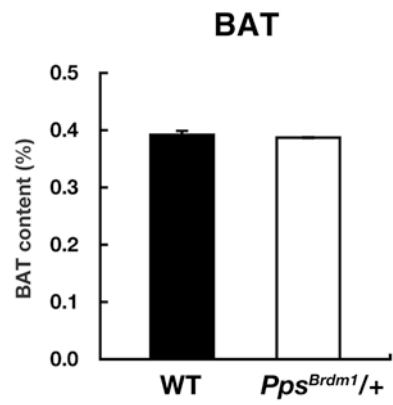

Supplementary Fig. 3 Ijuin et al.

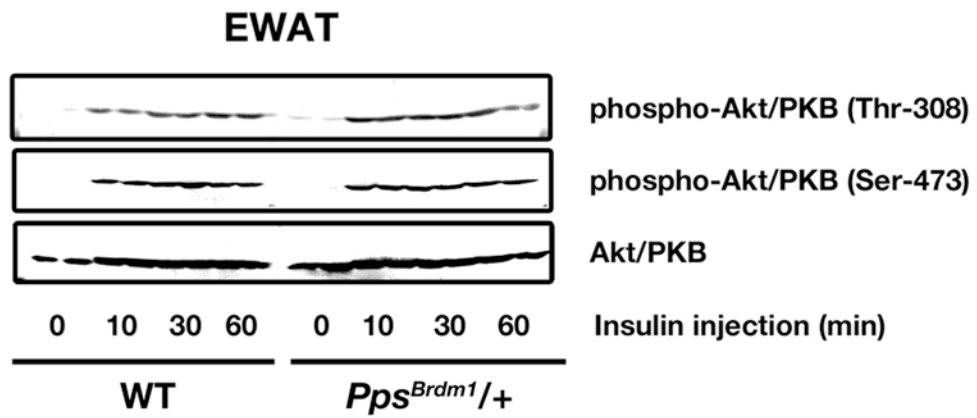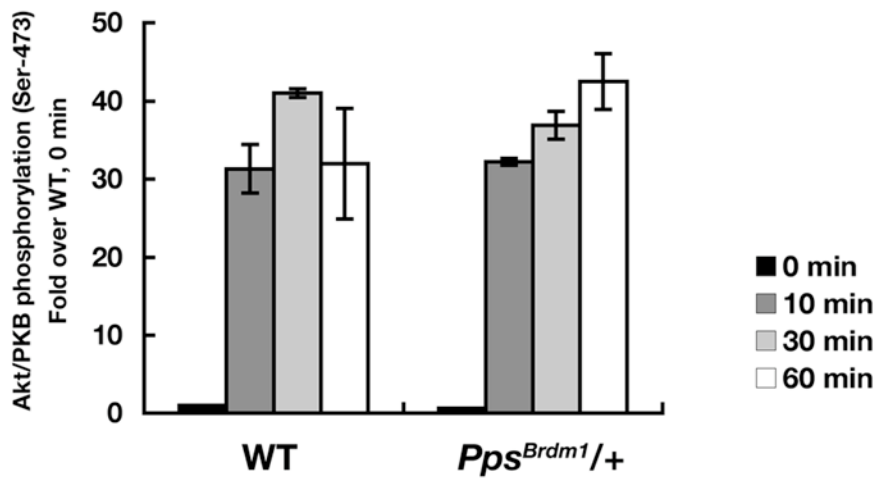

**Supplementary Fig. 4 Ijuin et al.**

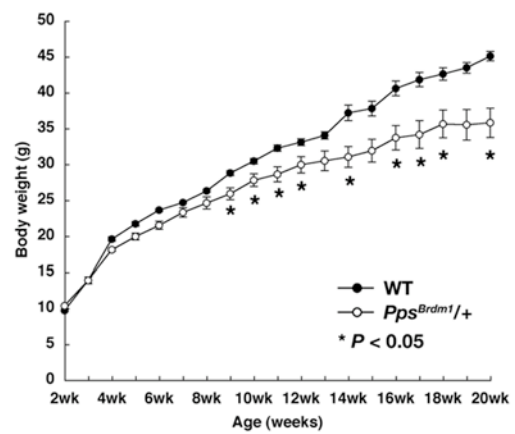

Supplementary Fig. 5 Ijuin et al.

**I. B.  $\alpha$ -Myc**

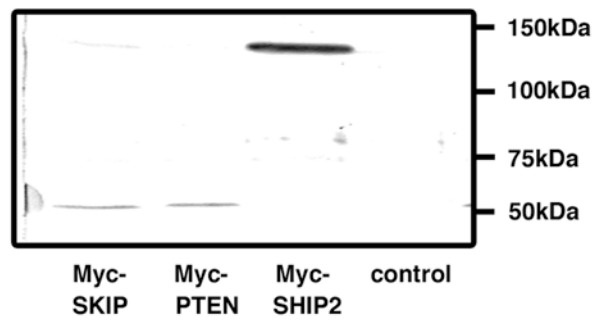

Supplementary Figure. 6 Ijuin et al.
